# Supplementary material
Source: publisher figshare collection journal article supplement (https://springernature.figshare.com/ndownloader/files/36638895)
Supplement: Supplementary file 1 [file 36638895]

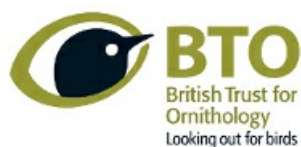

## BIRD RINGING PERMIT

Dr L R Griffin  
WWT Caerlaverock  
Eastpark Farm  
Caerlaverock  
Dumfries  
DG1 4RS

Permit Class and Number

/ A / 5436

This permit expires on 31 March 2020

Usual signature of holder

---

Subject to any restrictions opposite, the permit holder is authorised on behalf of the Ringing Committee to: ring fledged birds, use any special methods as listed opposite

This permit is issued by the Licensing Officer for and on behalf of the British Trust for Ornithology  
Dated 22/03/2019

This permit is issued under the WILDLIFE AND COUNTRYSIDE ACT 1981 as amended by the ENVIRONMENTAL PROTECTION ACT 1990 and the WILDLIFE (NORTHERN IRELAND) ORDER 1985. The licenses held by the Trust at the address below, granted by each of the licensing authorities in England, Scotland, Wales and Northern Ireland allow the holder of this permit to engage in the activities hereby authorised. Added eggs may be taken under this permit but must be destroyed after examination, or sent to a recognised scientific institution for examination and storage. This permit does not authorise the holder to intentionally disturb any Schedule 1 wild bird in, on, near, or while building a nest or dependent young of such a bird; nor to use any other marking method unless authorised under "Special Methods" below. The permit holder is covered by public liability insurance whilst carrying out ringing activities within Britain, Northern Ireland and Eire. Nothing in this permit shall confer any right of entry on to land or property. This permit is granted subject to compliance with the conditions specified. Anything done otherwise than in accordance with the terms of the permit may constitute an offence. This permit conveys no authority for actions prohibited by any legislations other than that specified above.

### Restrictions:

To target full grown wildfowl and Common Crane only.

### Special Methods:

Authorised to use/take the following Methods:

11-02w GPS (darvic neck collar) on Bean Goose. - Project lead  
06-01w VHF/SAT/GPS (elasticated harness and glue attachment) on Barnacle Goose. - Project lead  
11-57w GPS (darvic neck collar) on Greenland White-fronted Goose. - Project lead  
14-60w Neck collar on Barnacle Goose. - Project lead  
Methods as detailed on WWT wildfowl list. - Agent refer to project lead license for validity  
17-15 Neck Collar (GPS Ornitela tags) on Greenland White-fronted Goose - Agent refer to project lead license for validity  
18-75 Pulling three fully grown contour feathers from the flanks of full grown Bewick's Swan. - Agent refer to project lead license for validity

### Cannon Netting:

Authorised to use/take Geese and Swans in all areas of UK and RoI, with a maximum 100 Geese, 50 ducks and 30 Swans in non-tidal situations.
